# Supplementary material for: Ncl1-mediated metabolic rewiring critical during metabolic stress
Source: Life Sci Alliance. 2019 Aug 15;2(4):e201900360. doi: 10.26508/lsa.201900360 (PMC6696984; doi:10.26508/lsa.201900360)
Supplement: Supplementary file 2 [file LSA-2019-00360_TableS2.xlsx]

## Sheet: Sheet1
Supplememtary 02 : Proteins diffentially expressed by 12 hrs of cysteine treatment
Upregulated
				Fold change
				Rep1	Rep2	Rep3
Uniprot ID	Uniprot Gene Name	SGD Gene Name	SGD Secondary ID	Ratio Cys/Control	Ratio Cys/Control	Ratio Cys/Control	Average	p-value
P16521	EF3A	YEF3	YLR249W	2.355	6.1376	3.281	3.92453	0.0101809
P02994	EF1A	TEF2	YBR118W	2.0137	4.2855	2.2491	2.84943	0.0137203
P32324	EF2	EFT2	YDR385W	3.1046	3.02	2.421	2.84853	0.000188925
Q00955	ACAC	ACC1	YNR016C	3.1046	5.2481	2.8576	3.73677	0.00254395
P07259	PYR1	URA2	YJL130C	3.2509	5.2	3.6308	4.02723	0.00063768
P05030	PMA1	PMA1	YGL008C	4.8753	7.3114	4.5709	5.58587	0.000321102
P13663	DHAS	HOM2	YDR158W	2.9923	2.8054	2.466	2.75457	5.90289e-05
P03965	CARB	CPA2	YJR109C	4.3251	4.7424	3.8371	4.30153	1.86966e-05
P38891	BCA1	BAT1	YHR208W	2.8576	3.4674	3.1915	3.17217	3.31227e-05
P06208	LEU1	LEU4	YNL104C	4.0551	4.9204	3.9811	4.31887	2.75529e-05
P26321	RL5	RPL5	YPL131W	2.5586	4.9659	2.1086	3.21103	0.0134153
P39522	ILV3	ILV3	YJR016C	4.0179	6.8549	5.0582	5.31033	0.000442256
P11154	PYC1	PYC1	YGL062W	4.4875	2.0324	2.729	3.08297	0.00976496
Q12213	RL7B	RPL7B	YER069W	2.8054	4.9204	2.208	3.31127	0.00867132
P26783	RS5	RPS5	YDL066W	2.1878	3.3113	2.1281	2.5424	0.00310172
P41277	GPP1	GPP1	YIL053W	2.1677	2.582	2.0893	2.27967	0.00628864
P37291	GLYC	SHM2	YLR058C	3.3113	6.4269	3.1915	4.3099	0.00347822
P25443	RS2	RPS2	YGL123W	2.1478	4.2855	2.1086	2.8473	0.0133102
P32471	EF1B	EFB1	YAL003W	2.355	2.5119	2.0324	2.29977	0.00018897
P00815	HIS2	HIS4	YCL030C	5.2481	8.091	3.9446	5.76123	0.00121984
P14126	RL3	RPL3	YOR063W	2.6546	5.0582	2.1086	3.2738	0.0130968
P32449	AROG	ARO4	YBR249C	3.7325	5.4954	2.4889	3.9056	0.00458492
P49089	ASNS1	ASN1	YPR145W	3.0479	2.884	3.6983	3.21007	0.000103941
P08566	ARO1	ARO1	YDR127W	6.2517	17.378	4.0179	9.21587	0.00950141
P04076	ARLY	ARG4	YHR018C	2.8054	2.0893	2.421	2.43857	0.000484055
P06105	SC160	SCP160	YJL080C	4.8753	9.5499	3.281	5.90207	0.00578577
P04840	VDAC1	POR1	YNL055C	7.656	14.1906	5.8076	9.21807	0.00124056
P39976	DLD3	DLD3	YEL071W	3.4674	5.2481	3.9811	4.2322	0.000303441
Q12122	HOSM	LYS21	YDL131W	3.6983	3.6983	5.0119	4.13617	0.000154929
Q02642	NACB1	EGD1	YPL037C	5.1523	2.4889	4.0179	3.88637	0.00353717
P38009	PUR92	ADE17	YMR120C	2.0137	2.6303	3.0761	2.57337	0.00167322
P36008	EF1G2	TEF4	YKL081W	2.6062	3.7325	2.7542	3.03097	0.000604065
Q03690	CLU	CLU1	YMR012W	3.02	6.5464	2.6546	4.07367	0.00942033
P48570	HOSC	LYS20	YDL182W	2.3768	8.7096	4.0926	5.05967	0.0171055
P06103	EIF3B	PRT1	YOR361C	2.4434	3.4356	2.2699	2.7163	0.00153379
P14843	AROF	ARO3	YDR035W	2.5119	2.6546	2.355	2.50717	1.20024e-05
P40047	ALDH5	ALD5	YER073W	7.5858	6.3096	5.1051	6.3335	8.88022e-05
P0CX44	RL1B	RPL1B	YGL135W	2.6546	3.9811	2.421	3.0189	0.00210761
P32074	COPG	SEC21	YNL287W	2.6792	3.8019	2.4434	2.97483	0.0013517
P0C2H7	RL27B	RPL27B	YDR471W	2.704	11.1686	2.466	5.4462	0.0424297
P46990	RL17B	RPL17B	YJL177W	3.4995	5.5463	2.208	3.75127	0.00923181
P36013	MAOM	MAE1	YKL029C	9.6383	12.5893	6.4269	9.5515	0.000342789
P39935	IF4F1	TIF4631	YGR162W	6.7298	6.0256	4.8306	5.862	5.54145e-05
P0CX46	RL2B	RPL2B	YIL018W	2.9648	3.5645	2.2491	2.92613	0.00139385
P00899	TRPE	TRP2	YER090W	2.9107	2.6303	2.5351	2.69203	1.80733e-05
P06634	DED1	DED1	YOR204W	7.5858	12.5893	9.3756	9.85023	0.000103074
P39730	IF2P	FUN12	YAL035W	4.529	7.1121	4.6989	5.44667	0.000319377
P38934	BFR1	BFR1	YOR198C	2.8576	4.5709	2.8576	3.4287	0.00152619
Q04728	ARGJ	ARG7	YMR062C	3.8726	3.1046	4.3251	3.76743	0.000173557
P10869	AK	HOM3	YER052C	3.3113	3.2211	4.4055	3.64597	0.000213313
P41810	COPB	SEC26	YDR238C	3.8371	4.5709	3.4995	3.96917	6.23216e-05
Q12460	NOP56	NOP56	YLR197W	12.1339	19.5884	13.5519	15.0914	4.92135e-05
P0CX40	RS8B	RPS8B	YER102W	2.208	6.2517	2.0893	3.51633	0.0347336
P35732	DEF1	DEF1	YKL054C	6.4269	7.7983	3.5318	5.919	0.00193487
P0CX54	RL12B	RPL12B	YDR418W	2.6062	3.3729	2.208	2.72903	0.00131145
Q12166	LEU9	LEU9	YOR108W	3.4356	4.5709	4.8306	4.27903	0.000166096
P00498	HIS1	HIS1	YER055C	2.2284	2.4889	2.5119	2.40973	2.18443e-05
P28777	AROC	ARO2	YGL148W	4.4875	9.5499	2.1677	5.4017	0.0242644
P02406	RL28	RPL28	YGL103W	17.2187	4.5709	2.2491	8.0129	0.0444533
P14127	RS17B	RPS17B	YDR447C	2.2284	4.0551	2.3335	2.87233	0.00615634
P05748	RL15A	RPL15A	YLR029C	3.6983	5.9704	2.884	4.18423	0.00291567
P07342	ILVB	ILV2	YMR108W	19.4089	31.3329	24.4343	25.0587	2.06155e-05
P05317	RLA0	RPP0	YLR340W	2.0137	2.6792	2.0893	2.26073	0.000842269
Q08972	NEW1	NEW1	YPL226W	7.3114	6.4863	2.6303	5.476	0.00756731
P40212	RL13B	RPL13B	YMR142C	2.7797	2.7797	3.6308	3.0634	0.00023693
P38431	IF5	TIF5	YPR041W	3.1915	5.7544	2.5119	3.81927	0.00658167
P38113	ADH5	ADH5	YBR145W	9.8175	6.4863	6.9183	7.7407	9.46983e-05
P25567	SRO9	SRO9	YCL037C	2.6062	3.4356	4.8306	3.62413	0.00215006
Q02326	RL6A	RPL6A	YML073C	2.7797	6.6681	2.3335	3.9271	0.0180505
P53622	COPA	COP1	YDL145C	2.6546	3.9811	2.1677	2.93447	0.00428273
P38701	RS20	RPS20	YHL015W	2.6792	3.3113	2.2284	2.73963	0.000963956
P25491	MAS5	YDJ1	YNL064C	3.4041	2.6792	2.6792	2.92083	0.000182214
P47176	BCA2	BAT2	YJR148W	4.6989	5.3456	5.2481	5.09753	2.24088e-06
P40024	ARB1	ARB1	YER036C	6.2517	9.3756	6.6069	7.4114	9.72305e-05
P0CX48	RS11B	RPS11B	YBR048W	2.3768	4.2855	2.4434	3.03523	0.00506063
P07281	RS19B	RPS19B	YNL302C	2.2491	4.1687	2.9648	3.12753	0.00342038
Q12499	NOP58	NOP58	YOR310C	11.695	13.4277	10.7647	11.9625	2.73888e-06
P28274	URA7	URA7	YBL039C	10.9648	11.1686	8.0168	10.0501	2.84837e-05
P0CX32	RS24B	RPS24B	YIL069C	2.9107	4.8306	2.3121	3.35113	0.00595526
P04456	RL25	RPL25	YOL127W	2.7797	4.2073	2.6062	3.19773	0.00161592
P32473	ODPB	PDB1	YBR221C	7.379	8.6298	24.6604	13.5564	0.00293023
Q03148	SNZ1	SNZ1	YMR096W	21.0863	28.3139	12.5893	20.6632	0.000231227
P0CX83	RL19B	RPL19B	YBL027W	3.5645	5.2966	2.4434	3.76817	0.0046287
P25605	ILV6	ILV6	YCL009C	4.4875	4.4463	3.0479	3.9939	0.000425321
P39990	SNU13	SNU13	YEL026W	3.4041	4.8753	4.4875	4.25563	0.000188502
P0CX85	RL35B	RPL35B	YDL136W	4.1305	5.6494	2.5586	4.11283	0.00408202
P10964	RPA1	RPA190	YOR341W	4.0551	6.5464	4.8306	5.14403	0.000319476
P27476	NSR1	NSR1	YGR159C	12.5893	15.8489	8.0168	12.1517	0.000252145
P0CX50	RL18B	RPL18B	YNL301C	2.704	5.445	4.529	4.226	0.00260656
P05756	RS13	RPS13	YDR064W	2.6062	4.6989	2.1086	3.1379	0.0106516
P05745	RL36A	RPL36A	YMR194W	2.1281	4.6132	3.6308	3.45737	0.00647638
P0CX42	RL23B	RPL23B	YER117W	2.466	3.8371	2.2909	2.86467	0.0031205
P05319	RLA2	RPP2A	YOL039W	2.8576	4.6132	2.466	3.31227	0.00357096
P14120	RL30	RPL30	YGL030W	2.4889	3.4995	2.0701	2.68617	0.00330529
P15646	FBRL	NOP1	YDL014W	9.0365	15.417	18.197	14.2168	0.000245377
P12385	ERF1	SUP45	YBR143C	3.5318	7.3114	3.9084	4.9172	0.00249801
P15303	SEC23	SEC23	YPR181C	3.4041	4.3652	6.0256	4.5983	0.000821295
P32558	SPT16	SPT16	YGL207W	4.4875	4.9659	4.9204	4.79127	1.08907e-06
P22147	XRN1	XRN1	YGL173C	4.3652	10.666	3.5975	6.20957	0.00698431
P53235	EIF2A		YGR054W	3.0479	3.7325	3.9811	3.58717	9.38783e-05
P32891	DLD1	DLD1	YDL174C	2.4889	7.1779	8.3176	5.9948	0.0118104
P32563	VPH1	VPH1	YOR270C	3.9811	8.9536	4.4463	5.79367	0.00264888
P39517	DHH1	DHH1	YDL160C	2.2284	3.5645	2.0512	2.6147	0.00566765
O14467	MBF1	MBF1	YOR298C-A	2.5351	3.5975	2.1281	2.75357	0.00305176
P41911	GPD2	GPD2	YOL059W	4.6132	6.8549	6.1944	5.8875	0.000121023
P32445	RIM1	RIM1	YCR028C-A	13.6773	12.3595	16.7494	14.2621	7.70136e-06
P16387	ODPA	PDA1	YER178W	12.8233	18.5353	18.0302	16.4629	1.9337e-05
P27692	SPT5	SPT5	YML010W	3.2509	4.1687	2.6062	3.34193	0.000937128
P38988	GGC1	GGC1	YDL198C	8.6298	29.6483	16.9044	18.3942	0.00144165
P53849	GIS2	GIS2	YNL255C	6.9183	4.7424	4.529	5.39657	0.000241505
P51601	GCH1	FOL2	YGR267C	4.8306	2.5351	3.9446	3.7701	0.00245645
P0CX26	RL43B	RPL43B	YJR094W-A	2.466	3.342	2.0893	2.63243	0.00231706
Q3E7X9	RS28A	RPS28A	YOR167C	2.5119	5.2	2.2909	3.33427	0.0119705
Q05022	RRP5	RRP5	YMR229C	7.5162	2.3768	16.7494	8.8808	0.0284746
P32911	SUI1	SUI1	YNL244C	2.6546	4.1687	2.1878	3.0037	0.00511905
P02992	EFTU	TUF1	YOR187W	2.9648	7.7983	3.281	4.68137	0.00929378
P07703	RPAC1	RPC40	YPR110C	2.3121	4.2073	2.884	3.13447	0.00313504
P23644	TOM40	TOM40	YMR203W	4.8753	4.9659	3.3729	4.4047	0.000310483
P38912	IF1A	TIF11	YMR260C	3.6644	3.5318	2.9107	3.36897	7.12188e-05
P32332	OAC1	OAC1	YKL120W	3.2211	7.1121	5.0119	5.11503	0.00231424
P38765	YHI9	YHI9	YHR029C	2.729	2.5823	8.3176	4.54297	0.0235552
P33322	CBF5	CBF5	YLR175W	23.5505	25.8226	30.761	26.7114	1.94708e-06
P25555	GBP2	GBP2	YCL011C	5.2481	3.2509	4.4463	4.3151	0.00050574
Q02892	NOG1	NOG1	YPL093W	5.8614	6.9823	6.2517	6.36513	3.48706e-06
P07172	HIS8	HIS5	YIL116W	3.9084	6.0813	3.8019	4.5972	0.000592272
P12695	ODP2	LAT1	YNL071W	9.0365	24.4343	13.1826	15.5511	0.000784965
P00927	THDH	ILV1	YER086W	2.884	6.3096	5.8614	5.01833	0.00336838
P53261	PESC	NOP7	YGR103W	2.1478	9.2045	13.0617	8.138	0.0285863
P20434	RPAB1	RPB5	YBR154C	2.0324	4.4463	2.4889	2.9892	0.0114797
P40010	NUG1	NUG1	YER006W	3.02	11.4815	4.0551	6.18553	0.015223
P43609	RSC8	RSC8	YFR037C	5.2481	3.8726	7.0469	5.3892	0.000664767
P38836	ECM14	ECM14	YHR132C	3.4041	2.0512	3.8371	3.09747	0.00465154
P02309	H4		YBR009C	20.893	19.7697	26.3027	22.3218	3.78726e-06
P38861	NMD3	NMD3	YHR170W	2.4889	6.9823	2.3768	3.94933	0.024321
P46971	PMT4	PMT4	YJR143C	4.4055	2.0701	6.792	4.42253	0.0166536
P49167	RL38	RPL38	YLR325C	2.421	3.6308	3.1623	3.07137	0.000738464
Q03532	HAS1	HAS1	YMR290C	23.9883	11.3763	15.7036	17.0227	0.000207968
P28007	GAR1	GAR1	YHR089C	2.7542	12.3595	24.4343	13.1827	0.0254468
P53615	CAN	NCE103	YNL036W	7.3114	10.4713	5.6494	7.8107	0.000348717
P32803	EMP24	EMP24	YGL200C	2.2909	3.4674	2.0137	2.59067	0.00487403
P36160	RPF2	RPF2	YKR081C	3.1915	6.4269	21.0863	10.2349	0.0213678
P49334	TOM22	TOM22	YNL131W	5.4954	2.8314	7.379	5.23527	0.00505046
Q08421	ETT1	ETT1	YOR051C	2.9376	6.0256	5.2	4.72107	0.00233801
Down-regulated
				Fold change
				Rep1	Rep2	Rep3
Uniprot ID	Uniprot Gene Name	SGD Gene Name	SGD Secondary ID	Ratio Cys/Control	Ratio Cys/Control	Ratio Cys/Control	Average	p-value
P00925	ENO2	ENO2	YHR174W	0.1754	0.2606	0.2858	0.2406	0.00064344
P14540	ALF	FBA1	YKL060C	0.2228	0.2399	0.2805	0.247733	3.26504e-05
P00924	ENO1	ENO1	YGR254W	0.0492	0.055	0.0698	0.058	1.00916e-05
P00358	G3P2	TDH2	YJR009C	0.3467	0.1995	0.3597	0.301967	0.00295994
P10591	HSP71	SSA1	YAL005C	0.1722	0.118	0.2938	0.194667	0.00297255
P05694	METE	MET6	YDR385W	0.2512	0.2858	0.4406	0.325867	0.00247725
P07149	FAS1	FAS1	YGL234W	0.2355	0.3342	0.4093	0.326333	0.00208605
P00942	TPIS	TPI1	YER069W	0.0832	0.3532	0.1888	0.2084	0.0144207
P19097	FAS2	FAS2	YPL231W	0.3733	0.3499	0.2965	0.3399	9.37253e-05
P15108	HSC82	HSC82	YMR186W	0.1259	0.3802	0.2582	0.254767	0.0106352
P14832	CYPH	CPR1	YDR155C	0.2938	0.2911	0.3373	0.3074	1.56651e-05
P12709	G6PI	PGI1	YBR196C	0.1923	0.3404	0.2249	0.252533	0.00117538
P39954	SAHH	SAH1	YER043C	0.2128	0.2512	0.2655	0.243167	2.85334e-05
P00950	PMG1	GPM1	YKL152C	0.3404	0.3664	0.4055	0.370767	3.9887e-05
P18899	DDR48	DDR48	YMR173W	0.4613	0.2188	0.1871	0.289067	0.00895416
P02829	HSP82	HSP82	YPL240C	0.302	0.2168	0.2938	0.270867	0.00024301
P00817	IPYR	IPP1	YBR011C	0.4055	0.2884	0.2858	0.326567	0.000598286
P38013	AHP1	AHP1	YLR109W	0.15	0.1644	0.2249	0.179767	0.000145964
P23254	TKT1	TKL1	YPR074C	0.2655	0.3048	0.3802	0.316833	0.000375201
P54115	ALDH6	ALD6	YPL061W	0.2208	0.2535	0.3467	0.273667	0.000597045
P00445	SODC	SOD1	YJR104C	0.1941	0.2208	0.1959	0.2036	2.75103e-06
P04806	HXKA	HXK1	YFR053C	0.0457	0.0802	0.1556	0.0938333	0.00215524
P32589	HSP7F	SSE1	YPL106C	0.4093	0.4656	0.4055	0.4268	4.39262e-05
P22202	HSP74	SSA4	YER103W	0.1159	0.0991	0.2168	0.143933	0.00112135
P60010	ACT	ACT1	YFL039C	0.4742	0.3981	0.3532	0.4085	0.000456254
P22137	CLH	CHC1	YGL206C	0.3311	0.4613	0.4446	0.412333	0.00103026
P19358	METK2	SAM2	YDR502C	0.118	0.1127	0.1614	0.1307	5.41984e-05
P34760	TSA1	TSA1	YML028W	0.2128	0.3048	0.2805	0.266033	0.000251155
P38720	6PGD1	GND1	YHR183W	0.4831	0.4699	0.4246	0.4592	3.78007e-05
P19414	ACON	ACO1	YLR304C	0.1786	0.177	0.2831	0.2129	0.000533033
P25694	CDC48	CDC48	YDL126C	0.2535	0.15	0.2249	0.209467	0.000562611
P47143	ADK	ADO1	YJR105W	0.2535	0.2754	0.278	0.268967	1.48079e-06
P41940	MPG1	PSA1	YDL055C	0.3404	0.3311	0.2512	0.307567	0.000255127
P29311	BMH1	BMH1	YER177W	0.3733	0.3076	0.15	0.276967	0.00815223
P31539	HS104	HSP104	YLL026W	0.2535	0.2148	0.1837	0.217333	7.88554e-05
P32582	CBS	CYS4	YGR155W	0.2992	0.3105	0.2965	0.302067	1.15712e-07
P17709	HXKG	GLK1	YCL040W	0.1202	0.1294	0.2032	0.150933	0.00030582
P22943	HSP12	HSP12	YFL014W	0.0535	0.0946	0.1629	0.103667	0.00181259
P22515	UBA1	UBA1	YKL210W	0.4325	0.2729	0.3698	0.3584	0.00151386
P0CS90	HSP77	SSC1	YJR045C	0.3981	0.3698	0.3945	0.387467	2.1431e-06
P31373	CYS3	CYS3	YAL012W	0.3837	0.3802	0.4365	0.400133	3.28591e-05
P38999	LYS9	LYS9	YNR050C	0.0249	0.0291	0.0773	0.0437667	0.000773656
P32861	UGPA1	UGP1	YGL234W	0.2109	0.2032	0.3192	0.244433	0.000587976
P06738	PHSG	GPH1	YPR160W	0.0483	0.057	0.1542	0.0865	0.00203543
P07262	DHE4	GDH1	YER069W	0.278	0.2443	0.3311	0.284467	0.000136679
P17967	PDI	PDI1	YCL043C	0.1294	0.1629	0.1542	0.148833	1.03903e-05
P32599	FIMB	SAC6	YDR129C	0.1086	0.2168	0.278	0.201133	0.00397507
P37012	PGM2	PGM2	YMR105C	0.0973	0.0384	0.0692	0.0683	0.00053266
P19882	HSP60	HSP60	YLR259C	0.3597	0.3664	0.4487	0.3916	0.000184168
P31116	DHOM	HOM6	YJR139C	0.278	0.1722	0.4093	0.2865	0.00636223
P32454	APE2	APE2	YKL157W	0.2148	0.2228	0.3467	0.261433	0.00088831
P07267	CARP	PEP4	YPL154C	0.3467	0.3162	0.4656	0.376167	0.00105173
P43616	DUG1	DUG1	YFR044C	0.3251	0.413	0.3565	0.364867	0.000130186
P17536	TPM1	TPM1	YNL079C	0.4246	0.4093	0.4246	0.4195	2.35481e-07
Q05016	YM71		YMR226C	0.4699	0.3664	0.3837	0.406667	0.000290059
Q12363	WTM1	WTM1	YOR230W	0.4055	0.3342	0.3221	0.353933	0.000127374
P15019	TAL1	TAL1	YLR354C	0.4018	0.3664	0.3767	0.381633	3.84958e-06
P15891	ABP1	ABP1	YCR088W	0.278	0.1905	0.2655	0.244667	0.000282035
P46367	ALDH4	ALD4	YOR374W	0.3251	0.2805	0.2965	0.3007	9.72331e-06
P54838	DAK1	DAK1	YML070W	0.1472	0.2938	0.2831	0.241367	0.00282676
P38295	MCFS2	EHT1	YBR177C	0.1959	0.1837	0.2805	0.220033	0.000312093
P31688	TPS2	TPS2	YDR074W	0.3597	0.4055	0.2805	0.348567	0.000603777
P49723	RIR4	RNR4	YGR180C	0.413	0.2421	0.2992	0.3181	0.00166264
P06115	CATT	CTT1	YGR088W	0.0421	0.0278	0.053	0.0409667	6.8529e-05
P40106	GPP2	GPP2	YER062C	0.2168	0.2938	0.3311	0.280567	0.00051942
Q07551	KAR		YDL124W	0.0619	0.0766	0.1169	0.0851333	0.000180602
P38715	GRE3	GRE3	YHR104W	0.0817	0.0912	0.1905	0.121133	0.00119143
P38427	TSL1	TSL1	YML100W	0.2291	0.3597	0.2512	0.28	0.000716006
Q03558	OYE2	OYE2	YHR179W	0.413	0.3908	0.2965	0.366767	0.000587927
P53319	6PGD2	GND2	YGR256W	0.0871	0.138	0.1514	0.1255	0.000250826
Q00764	TPS1	TPS1	YBR126C	0.4169	0.4018	0.4325	0.417067	2.08112e-06
P30624	LCF1	FAA1	YOR317W	0.2965	0.2109	0.263	0.2568	0.000163303
P00890	CISY1	CIT1	YNR001C	0.3192	0.3873	0.2965	0.334333	0.000158197
P29952	MPI	PMI40	YER003C	0.2582	0.3664	0.2884	0.304333	0.000313174
P40531	GVP36	GVP36	YIL041W	0.2965	0.263	0.3404	0.299967	8.43213e-05
P54114	ALDH3	ALD3	YMR169C	0.0402	0.0334	0.0938	0.0558	0.000708808
Q03104	MSC1	MSC1	YML128C	0.0581	0.054	0.0895	0.0672	6.56377e-05
P16474	GRP78	KAR2	YJL034W	0.2729	0.3873	0.3404	0.333533	0.000410615
P37302	APE3	APE3	YBR286W	0.2754	0.2858	0.3945	0.318567	0.000532238
P54113	PUR91	ADE16	YLR028C	0.3565	0.3221	0.2333	0.303967	0.0007024
P54839	HMCS	ERG13	YML126C	0.3311	0.3631	0.3048	0.333	2.61791e-05
P34216	EDE1	EDE1	YBL047C	0.3597	0.2089	0.4529	0.3405	0.0079738
P53912	YNN4		YNL134C	0.1854	0.1644	0.15	0.1666	8.10691e-06
Q04336	YM54		YMR196W	0.1486	0.0731	0.0887	0.103467	0.000397454
Q04792	DCE	GAD1	YMR250W	0.0817	0.0337	0.1318	0.0824	0.00271622
Q00055	GPD1	GPD1	YDL022W	0.2188	0.2249	0.2938	0.245833	0.000114386
P08524	FPPS	ERG20	YJL167W	0.1786	0.182	0.1941	0.1849	2.9689e-07
P15992	HSP26	HSP26	YBR072W	0.1393	0.0643	0.1514	0.118333	0.00127877
Q04869	YM94		YMR315W	0.4487	0.3467	0.4285	0.407967	0.000341457
P32614	FRDS	FRD1	YEL047C	0.3221	0.3565	0.3981	0.3589	7.33542e-05
P40495	LYS12	LYS12	YIL094C	0.2489	0.1191	0.169	0.179	0.00115403
P30822	XPO1	CRM1	YGR218W	0.4207	0.4285	0.492	0.447067	8.20387e-05
P24280	SEC14	SEC14	YMR079W	0.4325	0.4699	0.3467	0.416367	0.000621287
P29509	TRXB1	TRR1	YDR353W	0.4406	0.4169	0.492	0.449833	7.98091e-05
Q05905	HRI1	HRI1	YLR301W	0.4446	0.3908	0.4169	0.417433	1.94348e-05
P23641	MPCP	MIR1	YJR077C	0.2754	0.2208	0.3436	0.279933	0.000540616
P53184	PNC1	PNC1	YGL037C	0.2148	0.2466	0.2312	0.230867	3.25737e-06
P39958	GDI1	GDI1	YER136W	0.3281	0.2754	0.3767	0.326733	0.000240663
Q07653	HBT1	HBT1	YDL223C	0.1	0.1459	0.2466	0.164167	0.00200593
P17555	CAP	SRV2	YNL138W	0.3404	0.2938	0.3945	0.3429	0.000223796
P53839	GOR1	GOR1	YNL274C	0.3192	0.3105	0.2965	0.308733	6.71639e-07
P09938	RIR2	RNR2	YJL026W	0.2168	0.166	0.302	0.228267	0.000957604
Q06151	DCPS	DCS1	YLR270W	0.2148	0.227	0.3404	0.260733	0.000710122
P53111	ARI1	ARI1		0.3162	0.2377	0.3105	0.288133	0.000170247
P18544	ARGD	ARG8	YOL140W	0.4285	0.3664	0.4529	0.415933	0.000156004
Q12458	YPR1	YPR1	YDR368W	0.2489	0.2729	0.2884	0.270067	6.87156e-06
P31383	2AAA	TPD3	YAL016W	0.2858	0.4018	0.4966	0.394733	0.00404631
P21243	PSA1	SCL1	YGL011C	0.3733	0.4831	0.4742	0.443533	0.000590492
P20081	FKBP	FPR1	YNL135C	0.4529	0.3945	0.3908	0.412733	4.90297e-05
P36016	LHS1	LHS1	YKL073W	0.2704	0.1445	0.3105	0.2418	0.00334293
Q03103	ERO1	ERO1	YML130C	0.2443	0.138	0.1393	0.173867	0.000695592
P25087	ERG6	ERG6	YML008C	0.3837	0.3311	0.2606	0.325133	0.000545492
P14904	AMPL	APE1	YKL103C	0.3076	0.4325	0.4055	0.381867	0.000740241
Q01532	BLH1	LAP3	YNL239W	0.3076	0.2333	0.3373	0.292733	0.000362051
Q12335	PST2	PST2	YDR032C	0.2704	0.2535	0.2443	0.256067	1.34042e-06
P22146	GAS1	GAS1	YMR307W	0.413	0.3404	0.4742	0.4092	0.000716866
P14306	CPYI	TFS1	YLR178C	0.1009	0.1486	0.1355	0.128333	5.98549e-05
P17649	GABAT	UGA1	YGR019W	0.3048	0.2399	0.3133	0.286	0.000119761
P53598	SUCA	LSC1	YOR142W	0.2606	0.2884	0.2729	0.273967	1.56406e-06
P36060	MCR1	MCR1	YKL150W	0.3565	0.302	0.3631	0.340533	5.08846e-05
Q12068	GRE2	GRE2	YOL151W	0.1271	0.1871	0.2014	0.171867	0.0002377
P23776	EXG1	EXG1		0.1486	0.1419	0.2421	0.177533	0.000502461
P38795	NADE	QNS1	YHR074W	0.4446	0.4093	0.3499	0.401267	0.000197851
P22803	TRX2	TRX2	YGR209C	0.4055	0.3192	0.2443	0.323	0.00141124
P11745	RNA1	RNA1	YMR235C	0.4875	0.4831	0.4529	0.4745	5.55339e-06
Q03161	YMY9		YMR099C	0.3802	0.3105	0.263	0.3179	0.000407825
P09232	PRTB	PRB1	YEL060C	0.2228	0.0912	0.2582	0.190733	0.00575743
P33315	TKT2	TKL2	YBR117C	0.0871	0.0497	0.1159	0.0842333	0.00052389
P0CT04	IPB2	PBI2	YNL015W	0.0525	0.0679	0.1096	0.0766667	0.000265048
P07274	PROF	PFY1	YOR122C	0.2729	0.3342	0.3698	0.325633	0.000225013
P16649	TUP1	TUP1	YCR084C	0.413	0.4446	0.3221	0.393233	0.000640515
P53228	TAL2	NQM1	YGR043C	0.0855	0.0824	0.2333	0.133733	0.00330591
P34223	UBX1	SHP1	YBL058W	0.4055	0.2606	0.4093	0.358467	0.00215931
P43590	YFH6		YFR006W	0.2938	0.2421	0.3251	0.287	0.000130822
P14065	GCY1	GCY1	YOR120W	0.3133	0.1542	0.207	0.224833	0.00172061
P31787	ACBP	ACB1	YGR037C	0.3873	0.2535	0.3873	0.3427	0.00152006
Q03048	COFI	COF1	YLL050C	0.4875	0.4018	0.4406	0.4433	0.000127102
Q08977	YP260	CUB1	YPL260W	0.278	0.2421	0.3532	0.2911	0.000349796
P35719	MRP8	MRP8	YKL142W	0.3565	0.1977	0.4207	0.324967	0.00689819
Q08225	DPP3		YOL057W	0.3908	0.2168	0.2965	0.301367	0.00195682
P07258	CARA	CPA1	YOR303W	0.4285	0.3404	0.3698	0.379567	0.000132957
P33401	PGM1	PGM1	YKL127W	0.3945	0.1871	0.4207	0.3341	0.0112404
P01123	YPT1	YPT1	YFL038C	0.3133	0.413	0.4656	0.3973	0.0013343
P15873	PCNA	POL30	YBR088C	0.413	0.3802	0.3837	0.3923	3.65219e-06
Q04432	HSP31	HSP31	YDR533C	0.1432	0.1706	0.1159	0.143233	6.26336e-05
P53312	SUCB	LSC2	YGR244C	0.2443	0.0603	0.1486	0.151067	0.00756766
P15703	BGL2	BGL2	YGR282C	0.1722	0.15	0.1854	0.1692	8.80312e-06
P32775	GLGB	GLC3	YEL011W	0.1138	0.1271	0.1905	0.1438	0.000232235
P25349	YCP4	YCP4	YCR004C	0.0904	0.3767	0.492	0.3197	0.0605747
P19146	ARF2	ARF2	YDL137W	0.2399	0.4529	0.4325	0.3751	0.00758379
P38616	YGP1	YGP1	YNL160W	0.1995	0.1959	0.2443	0.213233	2.56674e-05
P25375	PRTD	PRD1	YCL057W	0.4966	0.133	0.3311	0.320233	0.0307648
P16622	HEMH	HEM15	YOR176W	0.2443	0.2051	0.2148	0.2214	8.57124e-06
Q08412	CUE5	CUE5	YOR042W	0.4246	0.413	0.4656	0.4344	2.10046e-05
P40582	GST1	GTT1	YIR038C	0.0964	0.092	0.1472	0.111867	0.000121068
P32472	FKBP2	FPR2	YDR519W	0.3981	0.2228	0.2399	0.286933	0.00215067
Q12305	RDL1	RDL1	YOR285W	0.2312	0.3162	0.4365	0.327967	0.00332377
Q06494	PLR1		YPR127W	0.2965	0.0625	0.2535	0.204167	0.0225467
P46680	AIP1	AIP1	YMR092C	0.4406	0.3664	0.3631	0.390033	0.000115046
Q04409	EMI2	EMI2	YDR516C	0.1941	0.3802	0.4613	0.3452	0.012697
P40363	SFGH		YJL068C	0.2729	0.2805	0.3664	0.3066	0.000222909
P36047	SDS22	SDS22	YKL193C	0.3342	0.3908	0.3767	0.367233	2.89687e-05
Q12123	DCS2	DCS2	YOR173W	0.3981	0.0946	0.2333	0.242	0.0197172
P25373	GLRX1	GRX1	YCL035C	0.3802	0.3251	0.3802	0.361833	4.05295e-05
Q04371	YMR7		YMR027W	0.4325	0.3048	0.492	0.409767	0.00310672
P39721	AIM2	AIM2	YAL049C	0.2466	0.1905	0.3467	0.261267	0.001379
P34227	PRX1	PRX1	YBL064C	0.1854	0.169	0.2606	0.205	0.000261501
P36010	NDK	YNK1	YKL067W	0.2188	0.2729	0.3565	0.282733	0.000811426
P30657	PSB7	PRE4	YFR050C	0.4246	0.4831	0.4325	0.446733	3.66441e-05
Q05979	KYNU	BNA5	YLR231C	0.3837	0.278	0.4446	0.368767	0.00184428
P32474	EUG1	EUG1	YDR518W	0.4656	0.207	0.2679	0.3135	0.00699421
P38804	SDO1L	RTC3	YHR087W	0.2911	0.3873	0.3342	0.337533	0.000187123
P53334	SCW4	SCW4	YGR279C	0.2938	0.2109	0.2679	0.257533	0.000158472
P17695	GLRX2	GRX2	YDR513W	0.3281	0.2911	0.3873	0.3355	0.000186073
Q06625	GDE	GDB1	YPR184W	0.1888	0.1959	0.3076	0.230767	0.000682794
P40517	YRB2	YRB2	YIL063C	0.4875	0.227	0.2466	0.320367	0.00772188
P38235	YBQ3		YBR053C	0.078	0.1738	0.3281	0.1933	0.0122237
P36139	PET10	PLN1	YKR046C	0.3342	0.3281	0.3192	0.327167	1.21832e-07
P00447	SODM	SOD2	YHR008C	0.2858	0.3076	0.1754	0.256267	0.00139582
P05375	PEM2	OPI3	YJR073C	0.15	0.3162	0.1393	0.201833	0.00307608
P39004	HXT7	HXT7	YDR342C	0.2582	0.1	0.1871	0.181767	0.00309128
P40581	GPX3	HYR1	YIR037W	0.3076	0.2312	0.2679	0.2689	8.88922e-05
P40580	BZRD	IRC24	YIR036C	0.2559	0.2655	0.3802	0.300533	0.000644785
P20485	KICH	CKI1	YLR133W	0.0991	0.1923	0.2754	0.188933	0.0042711
P53152	MMS2	MMS2	YGL087C	0.263	0.4966	0.2965	0.352033	0.00513
P0CX81	MTCU2	CUP1-2		0.0319	0.0912	0.1294	0.0841667	0.00334845
P42938	TDA10	TDA10	YGR205W	0.3467	0.1191	0.413	0.292933	0.0250746
P32356	TREA	NTH1	YDR001C	0.2679	0.3221	0.2831	0.291033	2.24485e-05
Q12443	RTN2	RTN2	YDL204W	0.1107	0.2992	0.2355	0.215133	0.00569239
P38234	RFS1	RFS1	YBR052C	0.2249	0.1117	0.3251	0.220567	0.00690991
Q04304	YMY0		YMR090W	0.0488	0.0887	0.0453	0.0609333	0.000180398
P36156	GTO2	ECM4	YKR076W	0.4831	0.2032	0.3532	0.3465	0.0114553
P38840	ARO9	ARO9	YHR137W	0.4018	0.3837	0.3631	0.382867	5.13698e-06
Q06608	PDXH		YPR172W	0.2582	0.3837	0.2249	0.288933	0.0013753
P10127	ADH4	ADH4	YGL256W	0.2228	0.0356	0.1236	0.127333	0.0129313
P38314	SDS24	SDS24	YBR214W	0.3251	0.0832	0.2606	0.222967	0.0173773
P38081	YBQ6		YBR056W	0.1169	0.4207	0.1837	0.240433	0.0138724
P53265	YG2W		YGR111W	0.4285	0.3162	0.3192	0.354633	0.000466247
Q12497	FMP16	FMP16	YDR070C	0.0225	0.0196	0.15	0.0640333	0.0081271
Q3E841	YN034	EGO4	YNR034W-A	0.2754	0.1738	0.1706	0.2066	0.000514247
P38773	DOG2	DOG2	YHR043C	0.1706	0.118	0.3342	0.2076	0.00543279
P28625	YIM1	YIM1	YMR152W	0.3342	0.263	0.4786	0.3586	0.00371917
Q12512	ZPS1	ZPS1	YOL154W	0.0449	0.0302	0.0724	0.0491667	0.000261613
Q12452	ERG27	ERG27	YLR100W	0.4285	0.4093	0.3373	0.3917	0.000211318
P38067	UGA2	UGA2	YBR006W	0.302	0.3908	0.3221	0.3383	0.000147972
